# Supplementary material for: Macrophage-Secreted Lipocalin-2 Promotes Regeneration of Injured Primary Murine Renal Tubular Epithelial Cells
Source: Int J Mol Sci. 2020 Mar 16;21(6):2038. doi: 10.3390/ijms21062038 (PMC7139578; doi:10.3390/ijms21062038)
Supplement: Supplementary file 1 [file ijms-21-02038-s001.pdf]

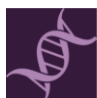

Article

# Supplementary Materials: Macrophage-secreted lipocalin-2 promotes regeneration of injured primary murine renal tubular epithelial cells

Anja Urbschat <sup>1</sup>, Anne-Kathrin Thiemens <sup>2</sup>, Christina Mertens <sup>3</sup>, Claudia Rehwald <sup>3</sup>, Julia K. Meier <sup>3</sup>, Patrick C. Baer <sup>2, #</sup> and Michaela Jung <sup>3, \*, #</sup>

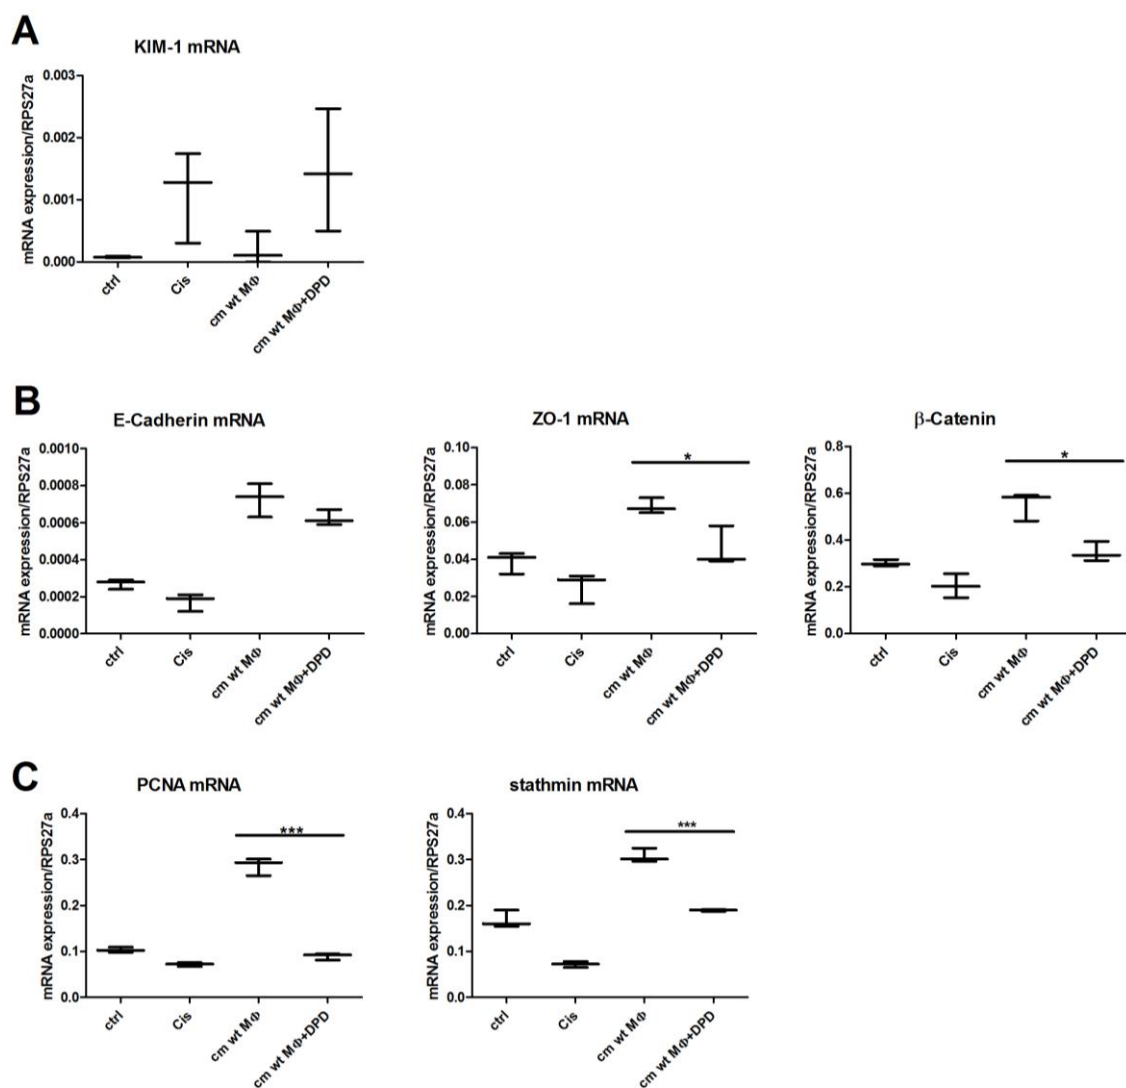

**Supplemental Figure 1: Addition of iron chelator 2'2 DPD blocks the protective effects of macrophage supernatants**

mRNA expression relative to the housekeeping gene RPS27a of the (A) injury marker KIM-1, (B) the epithelial phenotype marker E-Cadherin,  $\beta$ -catenin, and Zonula occludens-1 (ZO-1) as well as (C) proliferation markers PCNA and stathmin. . \* $p < 0.05$ , \*\*\* $p < 0.001$  ( $n = 3$ ; t-test).
